# Supplementary material for: A novel method for autophagy detection in primary cells: Impaired levels of macroautophagy in immunosenescent T cells
Source: PubMed Central journal article supplement — Autophagy. 2012 Apr 1;8(4):677–89. doi: 10.4161/auto.18935 (PMC3405842; doi:10.4161/auto.18935), 2012-04-01
Supplement: auto-8-677-s01.pdf [file auto-8-677-s01.pdf]

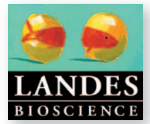

**Supplemental Material to:**

**Phadwal K, Alegre-Abarrategui J, Watson AS, Pike L,  
Anbalagan S, Hammond EM, Wade-Martins R, McMichael  
A, Klenerman P, Simon AK**

**A novel method for autophagy detection in primary cells:  
Impaired levels of macroautophagy in immunosenescent  
T cells**

**Autophagy 2012; 8(4); [http://dx.doi.org/10.4161/  
auto.8.4.18935](http://dx.doi.org/10.4161/auto.8.4.18935)**

**[www.landesbioscience.com/journals/autophagy/article/18935](http://www.landesbioscience.com/journals/autophagy/article/18935)**

Supplementary Fig 1

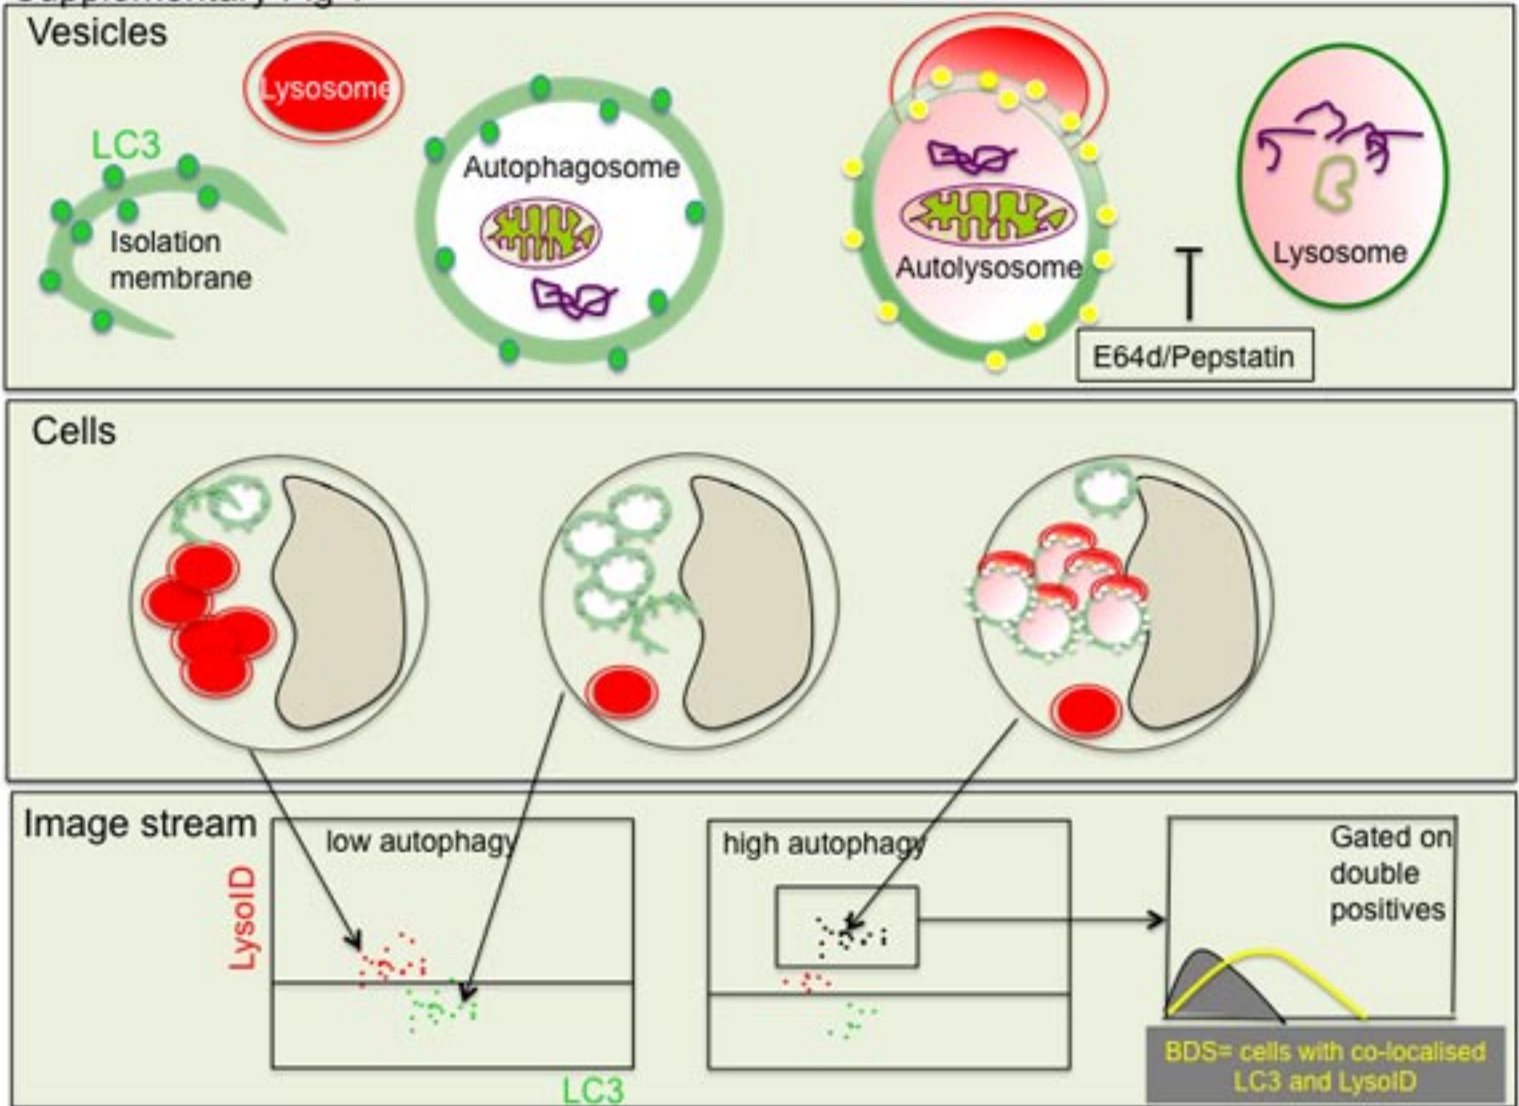

**Supplementary Figure 1.** Image stream-based autophagy detection technique. Upper panel: Vesicles involved in the autophagy process, lysosomes are depicted in red, autophagosomes in green decorated with LC3 (green dots). Addition of lysosomal inhibitors E64d/PepA allows arrest of autophagic flux. Middle panel: Single cells from left to right containing many lysosomes/ few autophagosomes, few lysosomes/many autophagosomes or upon induction of autophagy many autolysosomes. Lower Panel: Representative Image stream dot plots showing location of cells in dot plots, and gating strategy for BDS in histograms.

# Supplementary Fig 2

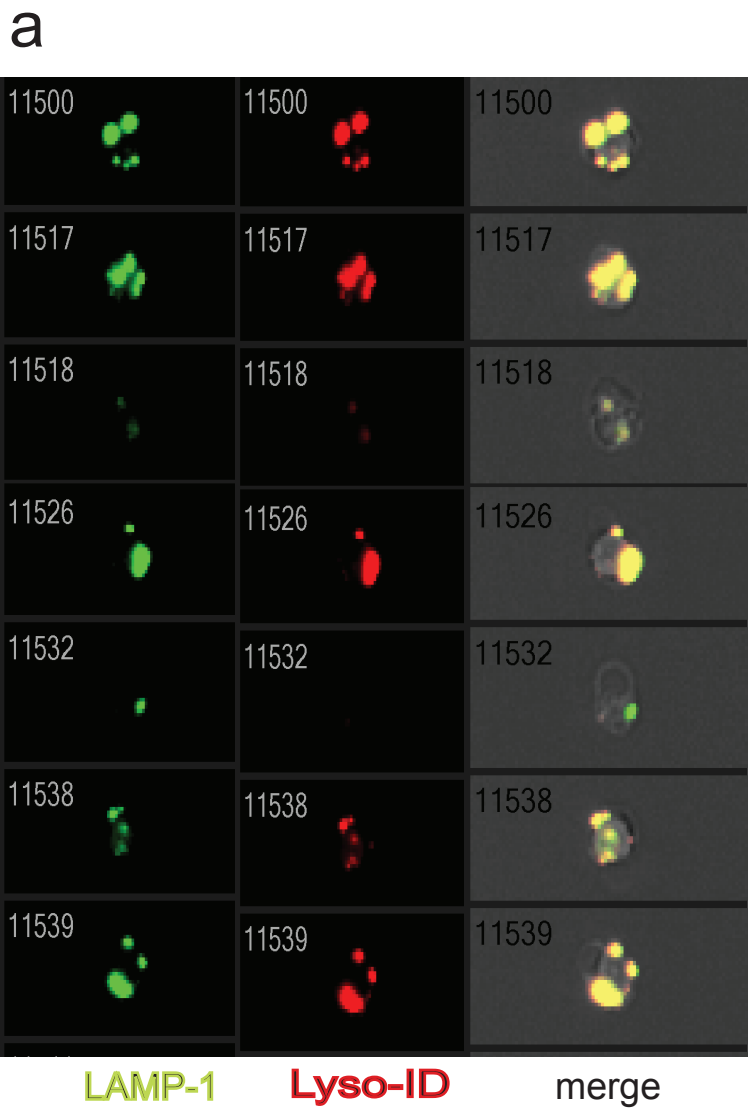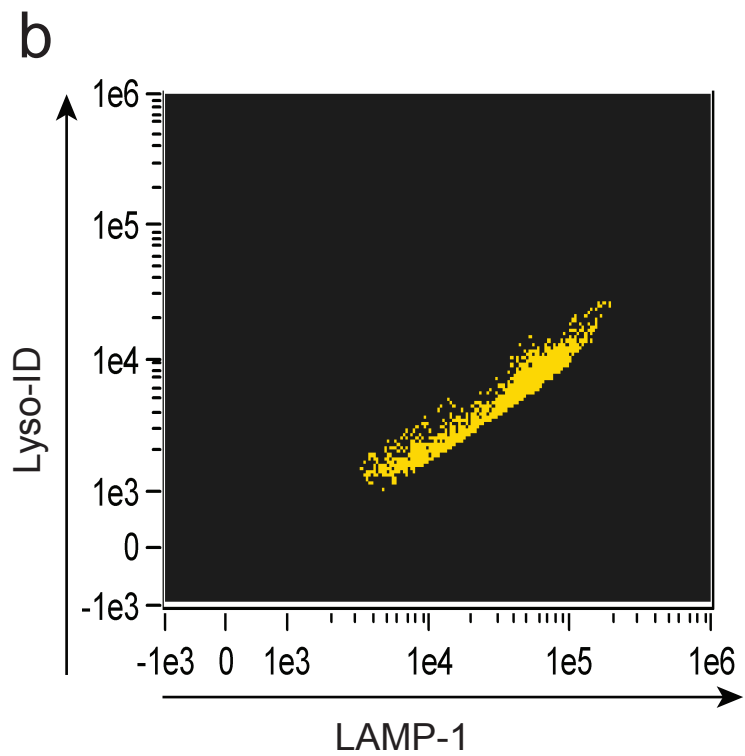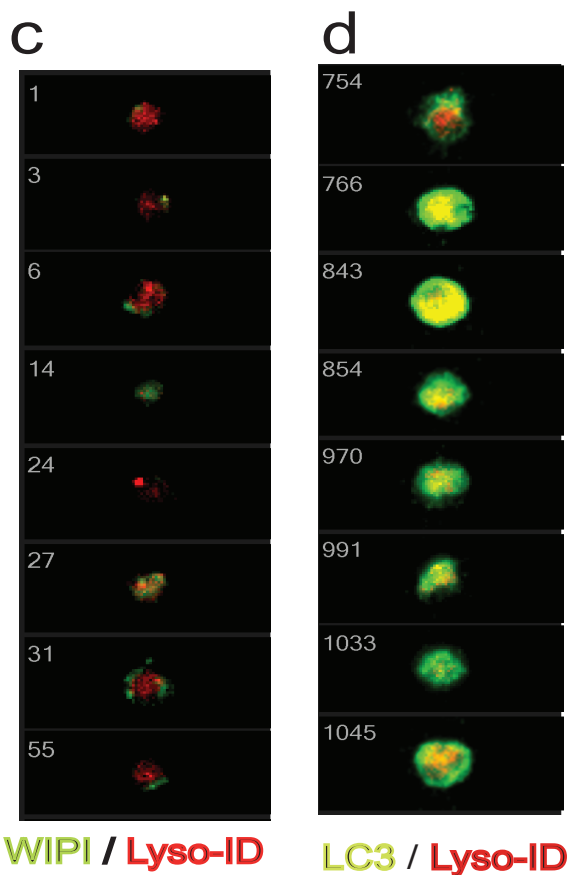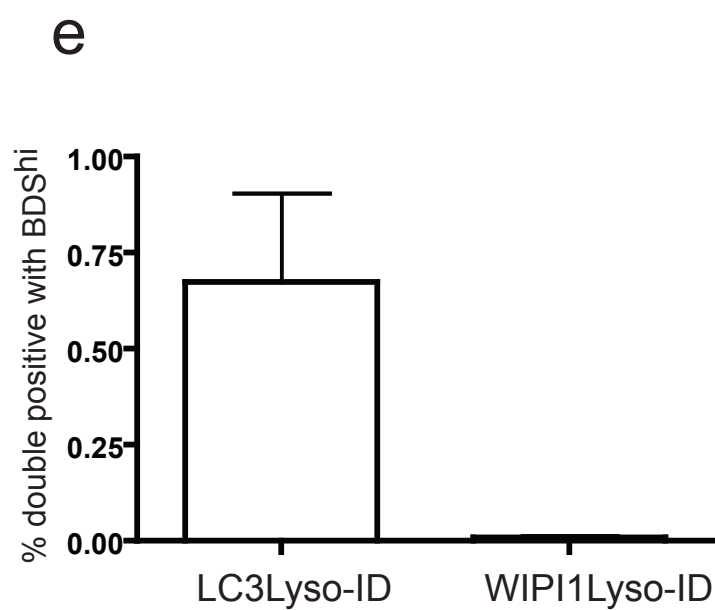

**Supplementary Figure 2.** Lysosomal markers correlate on Image stream. **(a)** Merge (yellow) of images of PBMCs stained with two lysosomal markers Lyso-ID (red) and LAMP-1 (green) **(b)** Correlation of Lyso-ID and LAMP-1 intensity dot plot. Representative co-localized images of PBMCs stained for **(c)** WIPI-1 (green) and Lyso-ID (red) **(d)** LC3 (green) and Lyso-ID (red). **(e)** BDS (represented as % total double positives, BDS<sup>hi</sup>) between WIPI-1 Lyso-ID and LC3 Lyso-ID stained PBMCs (mean  $\pm$  SEM.,  $n=4.$ , \* $p=0.0286$ ).
